# Supplementary material for: Stepwise optimization of tumor-targeted dual-action platinum(iv)-gemcitabine prodrugs
Source: Royal Society of Chemistry journal article supplement (doi:10.1039/d3qi02032k), 2023-12-06
Supplement: d3qi02032k1.pdf [file d3qi02032k1.pdf]

# Stepwise Optimization of Tumor-Targeted Dual-Action Platinum(IV)-Gemcitabine Prodrugs

## Supporting information

Alexander Kastner<sup>1,5</sup>, Theresa Mendrina<sup>1,2</sup>, Tomer Babu<sup>3</sup>, Subhendu Karmakar<sup>3</sup>, Isabella Poetsch<sup>2</sup>,  
Walter Berger<sup>2,4</sup>, Bernhard K. Keppler<sup>1,4</sup>, Dan Gibson<sup>\*3</sup>, Petra Heffeter<sup>\*2,4</sup>, and Christian R. Kowol<sup>\*1,4</sup>

<sup>1</sup> University of Vienna, Faculty of Chemistry, Institute of Inorganic Chemistry, Waehringer Str. 42, 1090 Vienna, Austria.

<sup>2</sup> Center of Cancer Research and Comprehensive Cancer Center, Medical University of Vienna, Borschkegasse 8a, 1090 Vienna, Austria.

<sup>3</sup> Institute for Drug Research, School of Pharmacy, The Hebrew University of Jerusalem, 9112102 Jerusalem, Israel

<sup>4</sup> Research Cluster "Translational Cancer Therapy Research", 1090 Vienna, Austria.

<sup>5</sup> University of Vienna, Vienna Doctoral School in Chemistry (DoSChem), Waehringer Str. 42, 1090 Vienna, Austria.

E-Mail: [christian.kowol@univie.ac.at](mailto:christian.kowol@univie.ac.at); [petra.heffeter@meduniwien.ac.at](mailto:petra.heffeter@meduniwien.ac.at); [dang@ekmd.huji.ac.il](mailto:dang@ekmd.huji.ac.il)

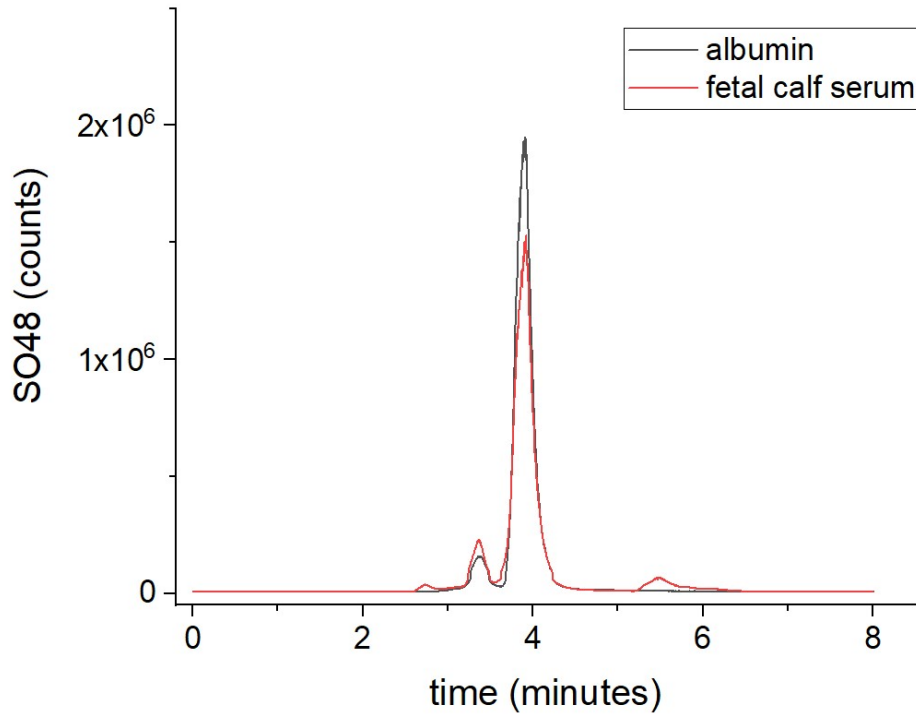

**Figure S1:** Sulfur traces of fetal calf serum (+150 mM phosphate buffer, pH 7.4) as well as pure albumin in phosphate buffer (50 mM, pH7.4), both measured by SEC-ICP-MS. The small peak at ~3.3 min corresponds to the albumin dimer.

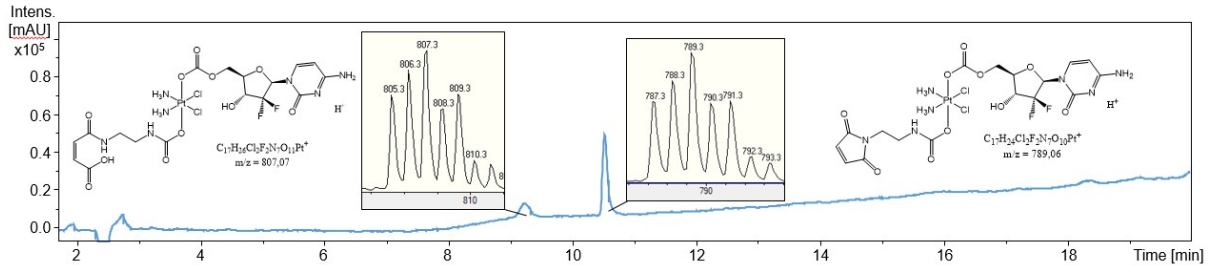

**Figure S2:** Peak assignment via HPLC-MS of the stability experiment for **CisPt-GemCarb-C<sub>2</sub>Mal** depicted in Figure 3.

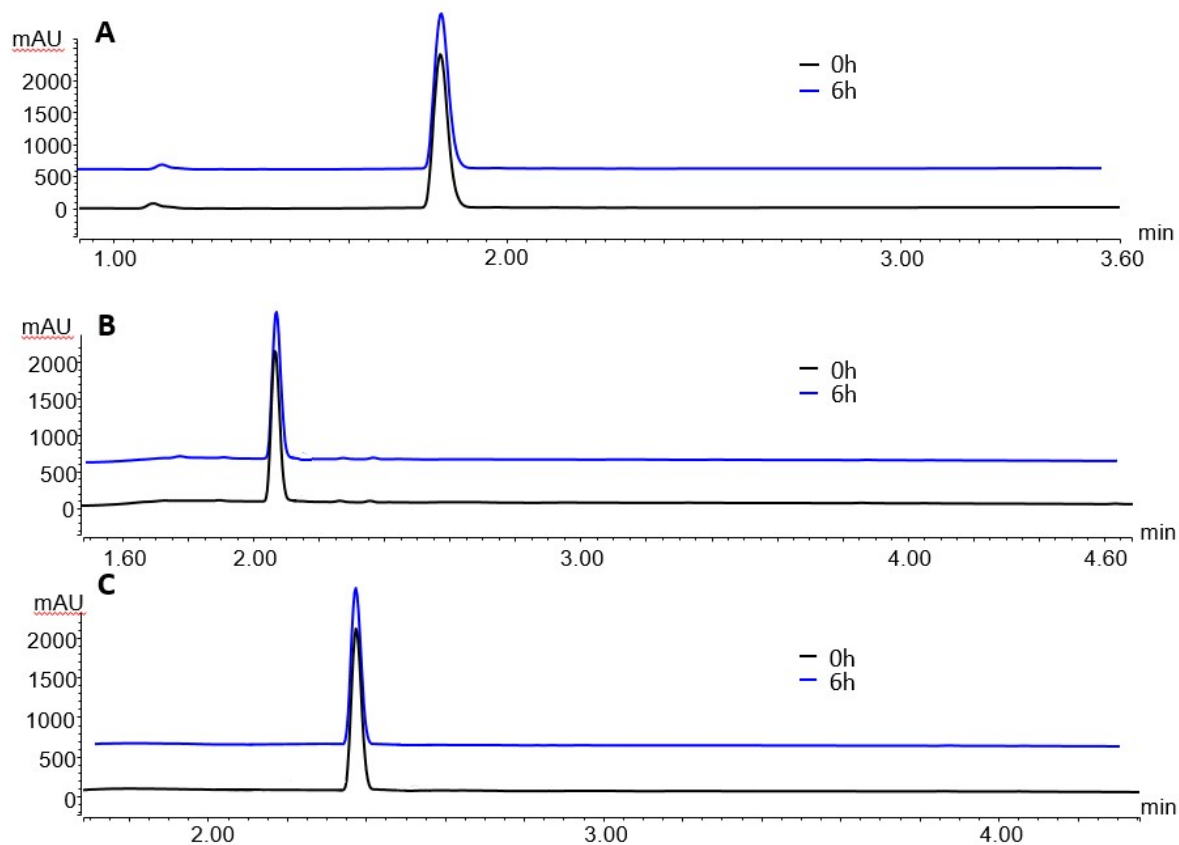

**Figure S3.** UV/Vis-traces (220 nm) of stability measurements of 1 mM **CisPt-GemCarb-OAc (A)**, **CisPt-GemSucc-OAc (B)** and **CarboPt-GemSucc-OAc (C)** in phosphate buffer (150 mM, pH 7.4) at 37 °C, measured with UHPLC.

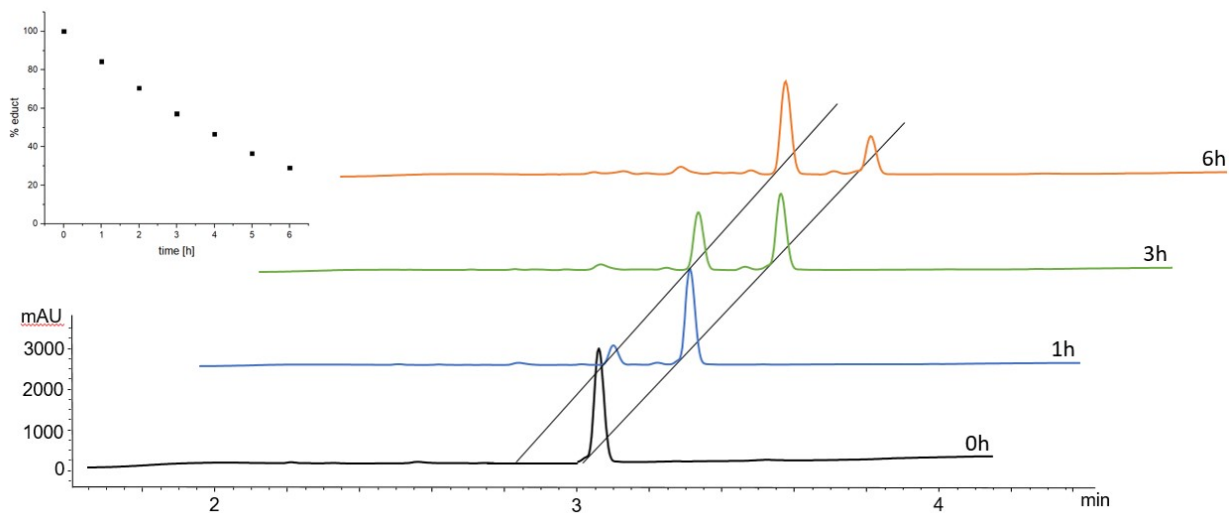

**Figure S4.** Maleimide hydrolysis of 1 mM **CisPt-GemSucc-C<sub>5</sub>Mal** in phosphate buffer (150 mM, pH 7.4) at 37 °C, monitored with UHPLC (220 nm).

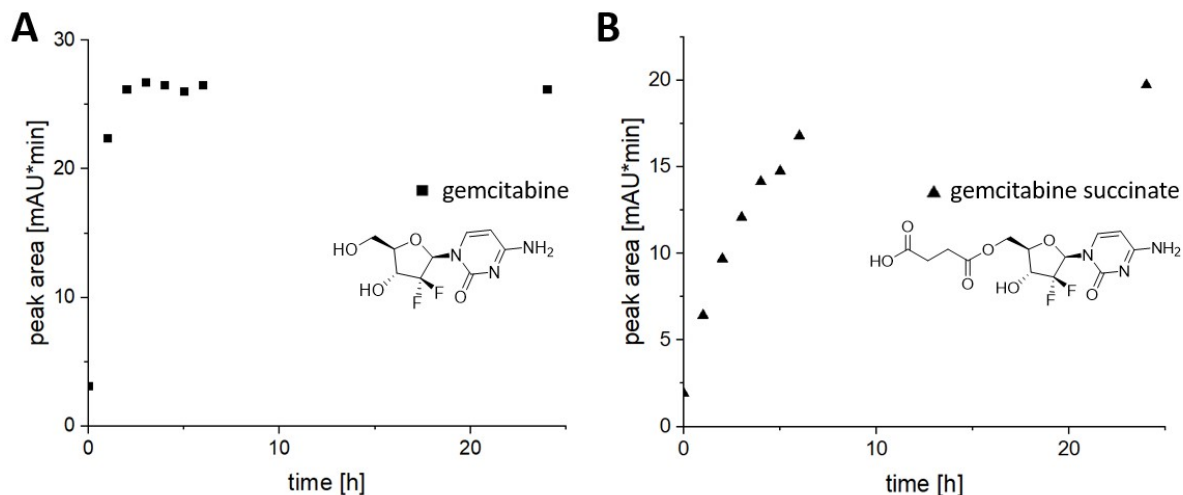

**Figure S5:** A) Gemcitabine release of the reduction kinetics of **CisPt-GemCarb-OAc** and (B) gemcitabine succinate release of the reduction kinetics of **CisPt-GemSucc-OAc**. The data were measured with UHPLC at 1 mM drug concentration in phosphate buffer (150 mM, pH 7.4) at 20 °C with 10 eq of ascorbic acid over 24 h.

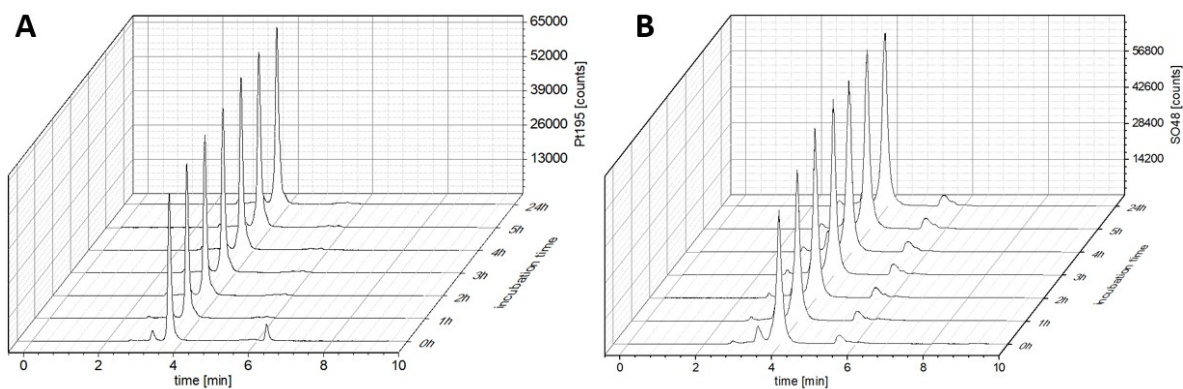

**Figure S6:** <sup>195</sup>Platinum (A) and <sup>48</sup>sulfur (B) traces of 100 μM **CisPt-GemSucc-C<sub>5</sub>Mal** incubated in FCS (buffered with 150 mM phosphate buffer, pH 7.4) at 37 °C, measured with ICP-MS.

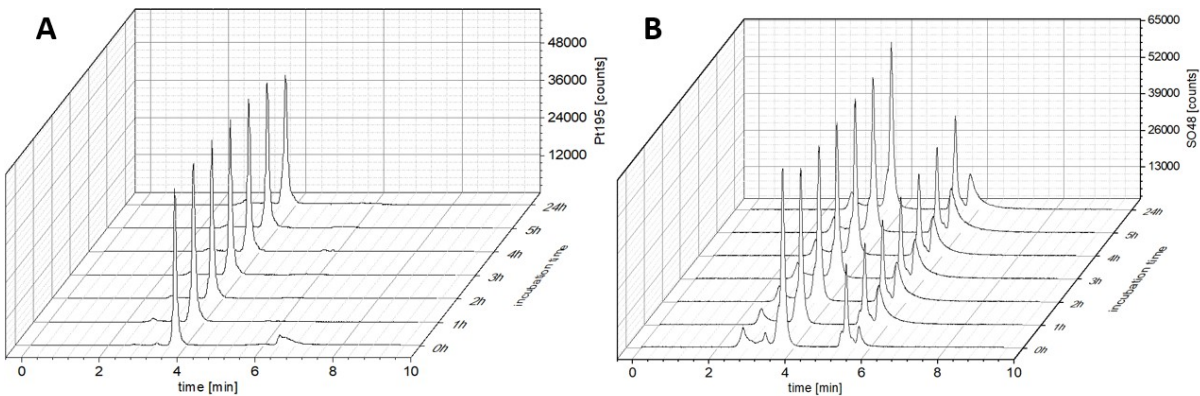

**Figure S7:** <sup>195</sup>Platinum (A) and <sup>48</sup>sulfur (B) traces of 100 μM **CarboPt-GemSucc-C<sub>5</sub>Mal** incubated in FCS (buffered with 150 mM phosphate buffer, pH 7.4) at 37 °C, measured with ICP-MS.

|                          |                                                     |
|--------------------------|-----------------------------------------------------|
| HPLC column:             | Acquity UPLC BEH 200Å 1.7 µm, 4.6x150 mm            |
| Eluent:                  | 50 mM CH <sub>3</sub> COONH <sub>4</sub> , pH = 6.8 |
| Flow rate:               | 400 µL/min                                          |
| Injection volume:        | 0.5 µL                                              |
| Column temperature:      | 37 °C                                               |
| Autosampler temperature: | 37 °C                                               |

**Table S1:** SEC-HPLC parameters for SEC-ICP-MS measurements.

|                        |            |
|------------------------|------------|
| Nebulizer:             | Quartz     |
| Spray chamber:         | Scott type |
| Nebulizer gas flow:    | 1.08 L/min |
| Aux. gas flow:         | 0.9 L/min  |
| Plasma gas flow:       | 15 L/min   |
| Reaction gas (oxygen): | 30 %       |
| ICP RF power:          | 1550 W     |
| m/z measured:          | 195, 48    |

**Table S2:** ICP-MS parameters for ICP-MS measurements.

# CisPt-GemCarb-OAc

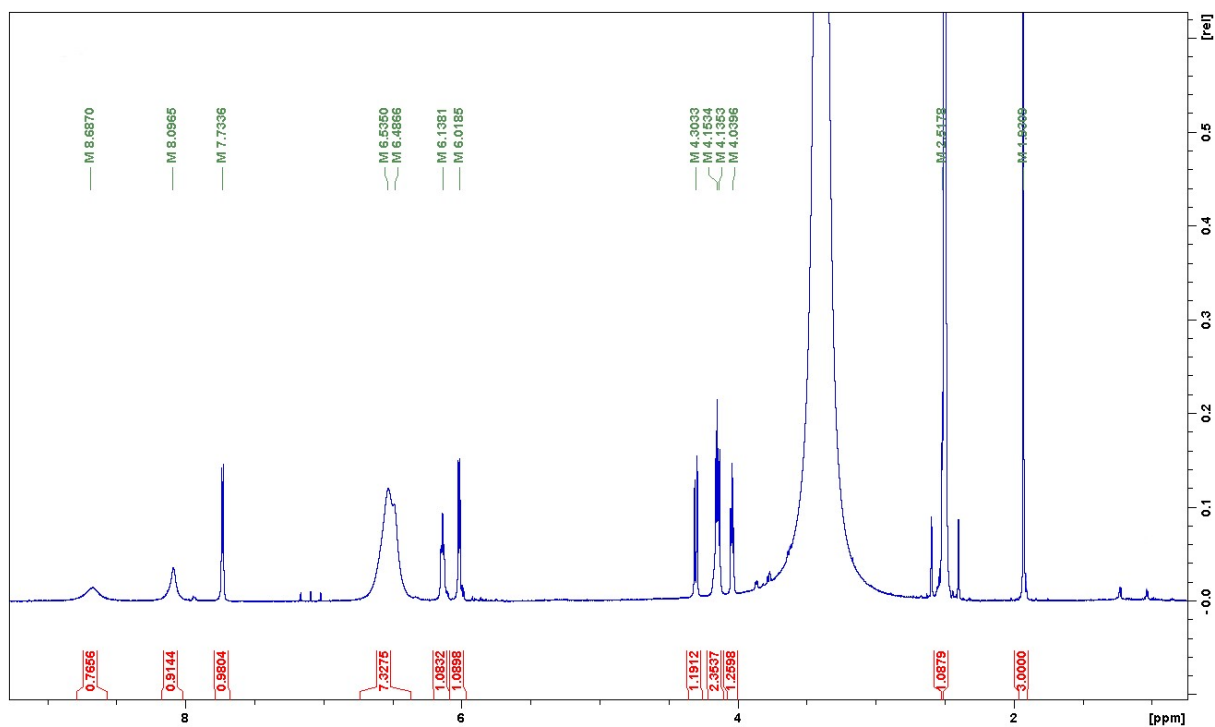

Figure S8: <sup>1</sup>H-NMR of CisPt-GemCarb-OAc.

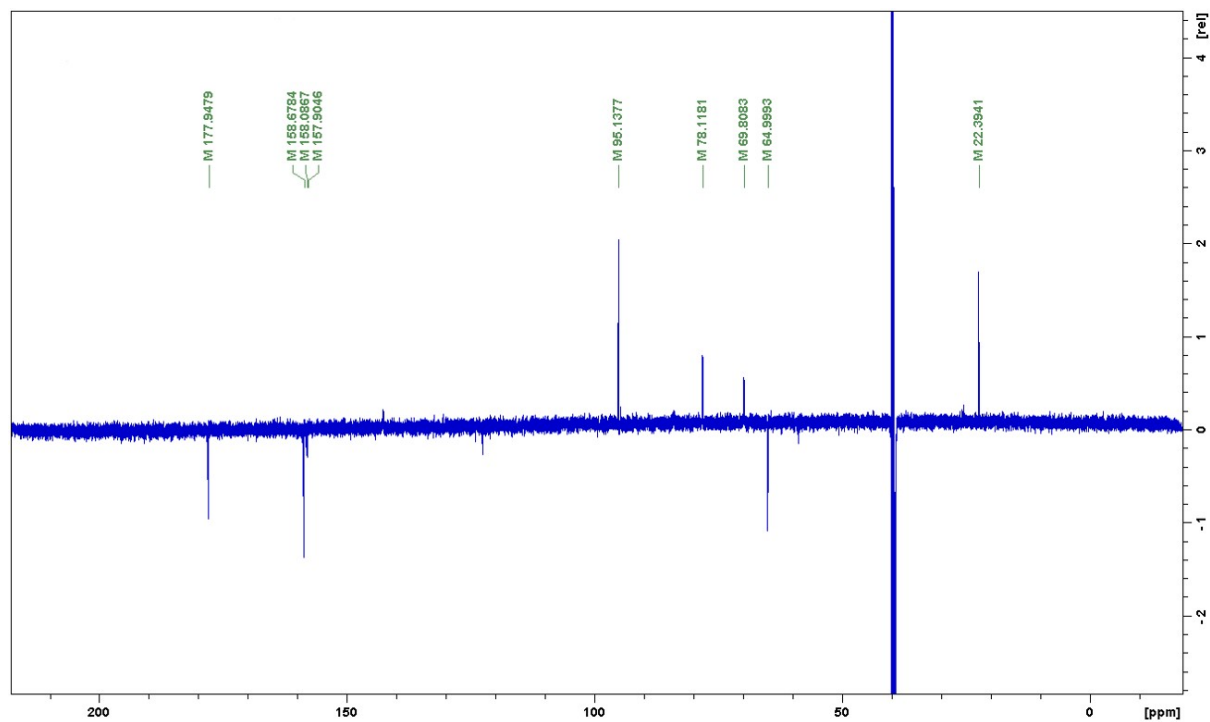

Figure S9: <sup>13</sup>C-NMR of CisPt-GemCarb-OAc.

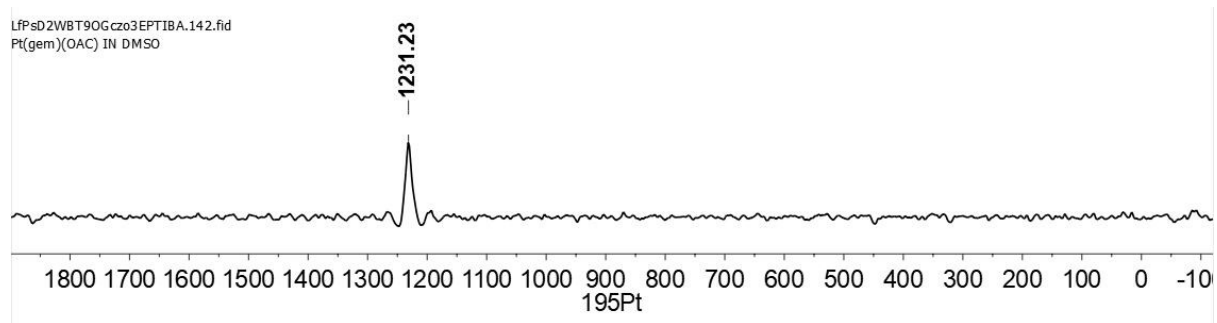

**Figure S10:**  $^{195}\text{Pt}$ -NMR of CisPt-GemCarb-OAc.

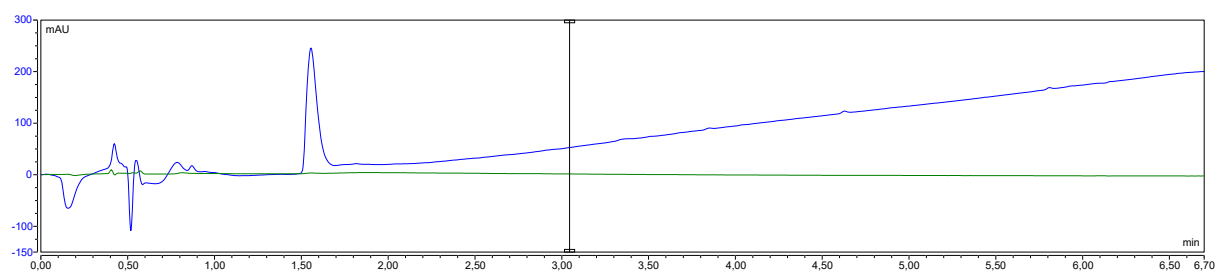

**Figure S11:** RP-HPLC chromatogram of CisPt-GemCarb-OAc.

### CisPt-GemCarb-C<sub>2</sub>Mal

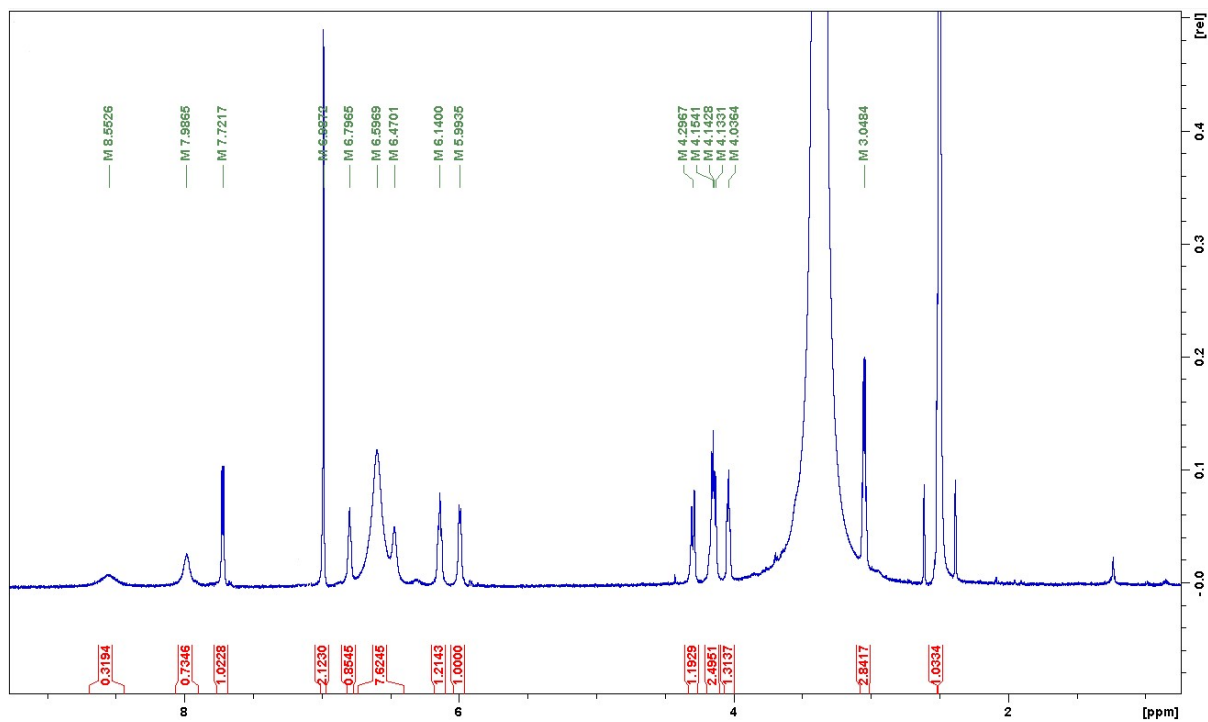

Figure S12: <sup>1</sup>H-NMR of CisPt-GemCarb-C<sub>2</sub>Mal.

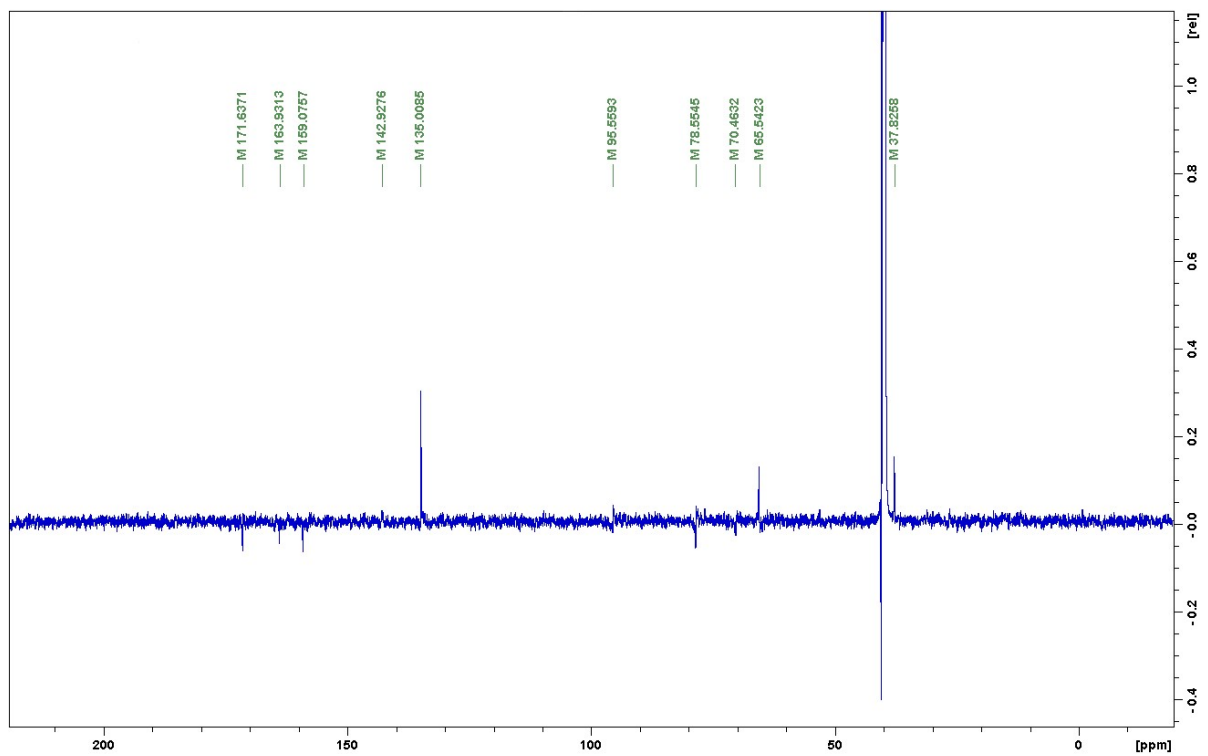

Figure S13: <sup>13</sup>C-NMR of CisPt-GemCarb-C<sub>2</sub>Mal.



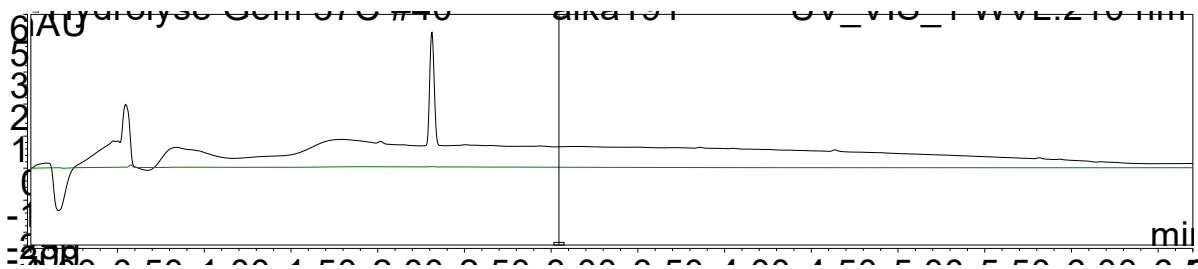

Figure S14: RP-HPLC chromatogram of CisPt-GemCarb-C<sub>2</sub>Mal.

CisPt-GemCarb-C<sub>5</sub>Mal

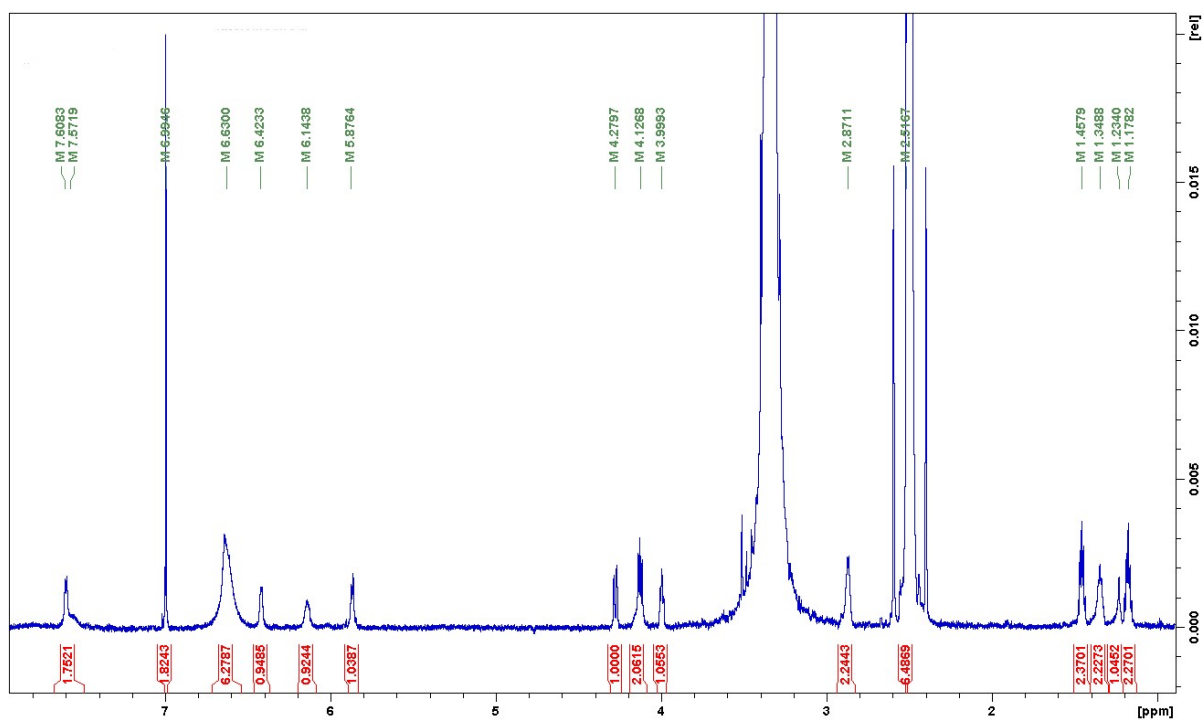

Figure S15: <sup>1</sup>H-NMR of CisPt-GemCarb-C<sub>5</sub>Mal.

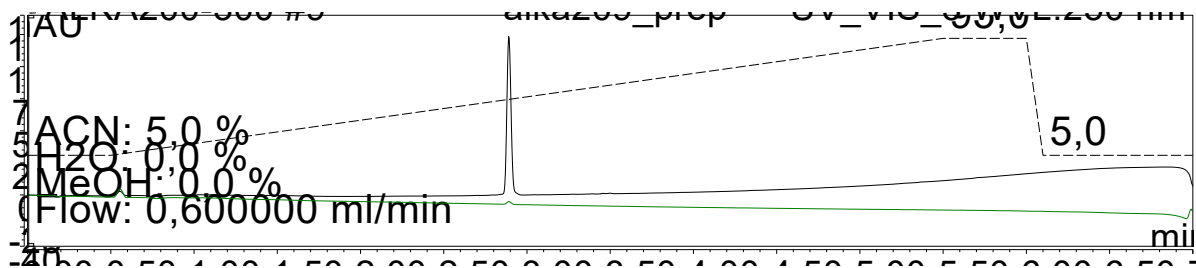

Figure S16: RP-HPLC chromatogram of CisPt-GemCarb-C<sub>5</sub>Mal.

### CisPt-GemSucc-OAc

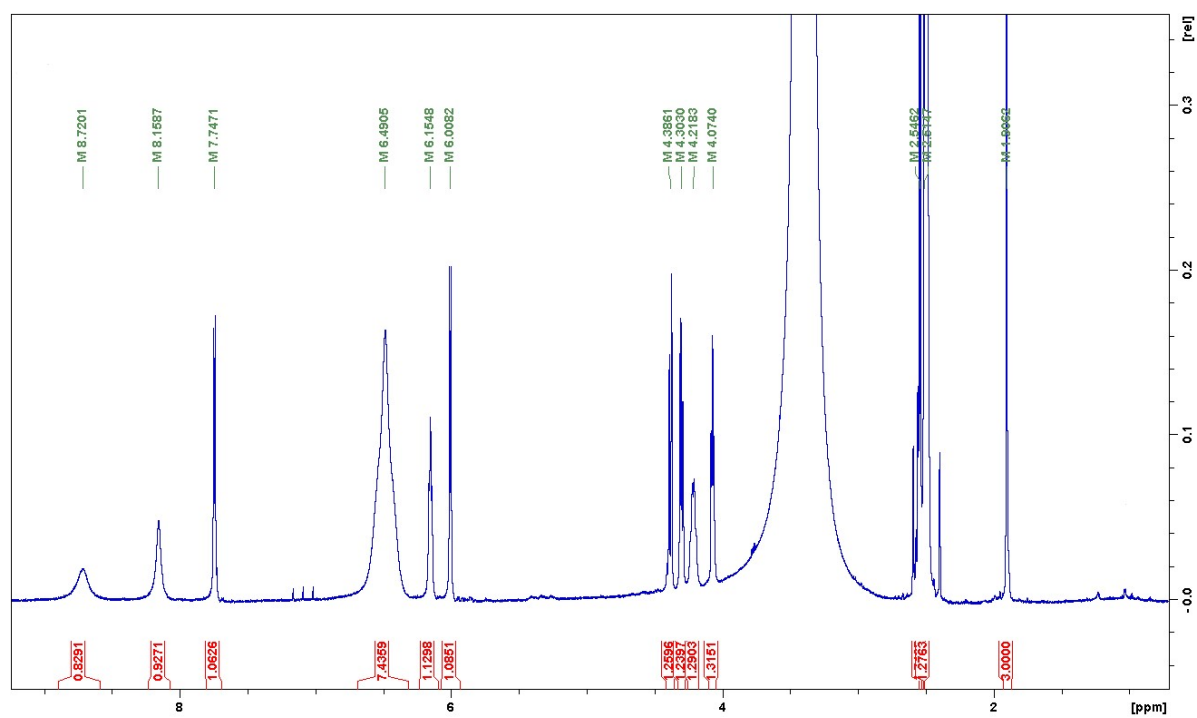

Figure S17: <sup>1</sup>H-NMR of CisPt-GemSucc-OAc.

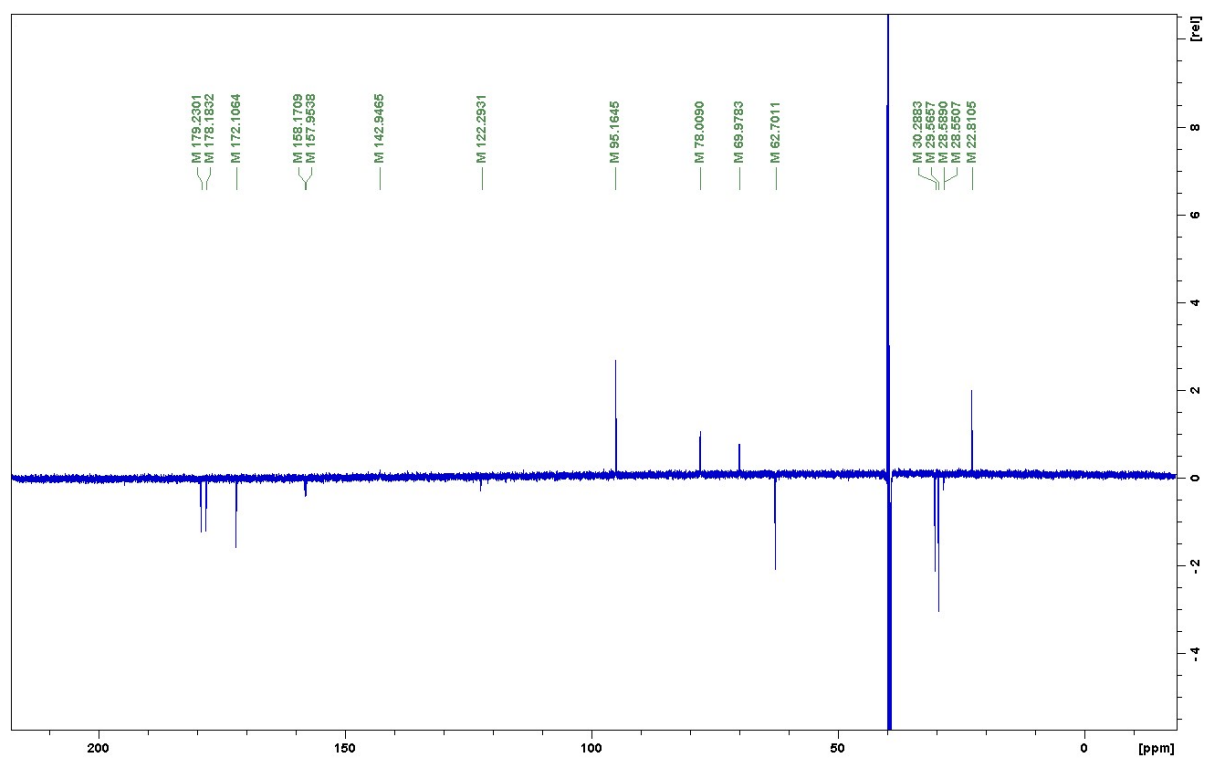

Figure S18: <sup>13</sup>C-NMR of CisPt-GemSucc-OAc.

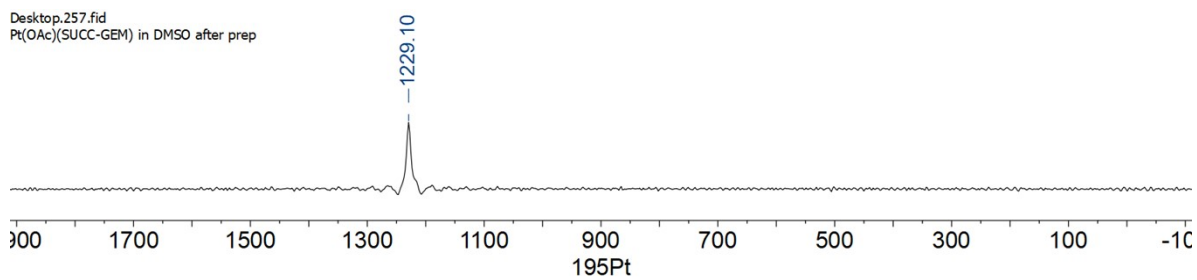

**Figure S19:**  $^{195}\text{Pt}$ -NMR of CisPt-GemSucc-OAc.

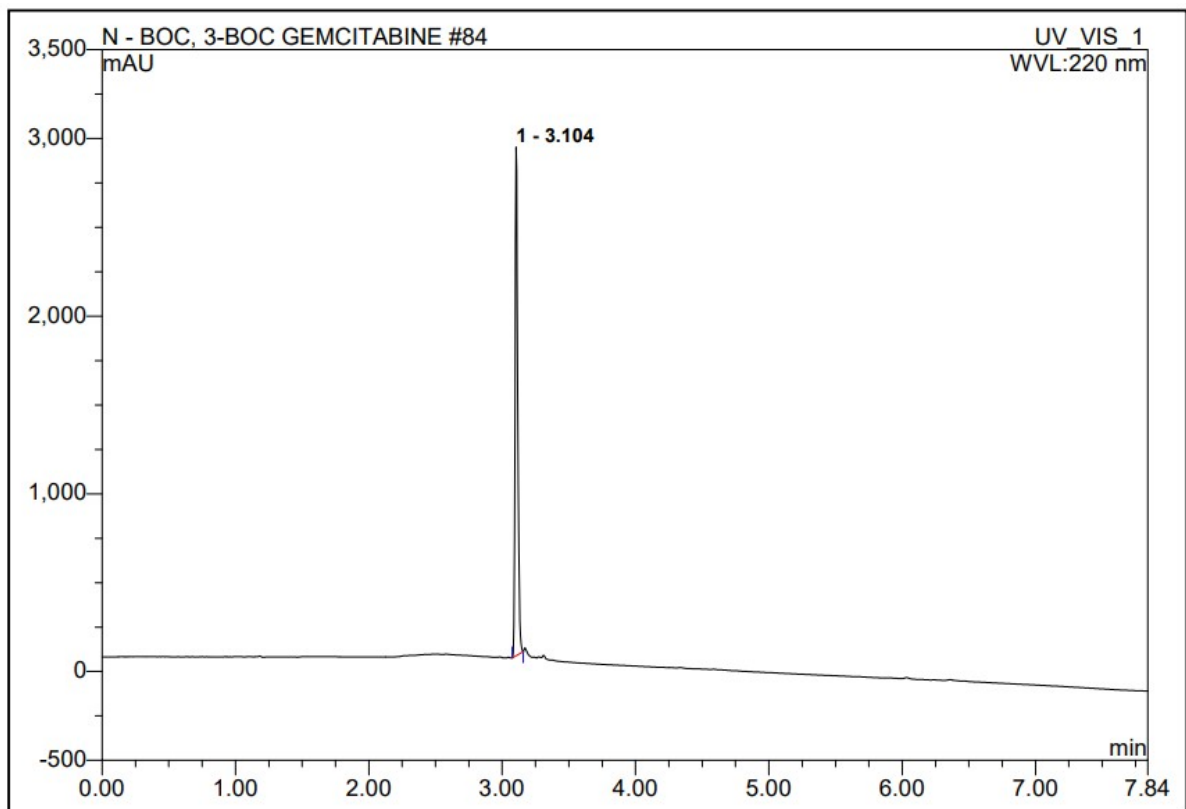

**Figure S20:** RP-HPLC chromatogram of CisPt-GemSucc-OAc.

### CisPt-GemSucc-C<sub>5</sub>Mal

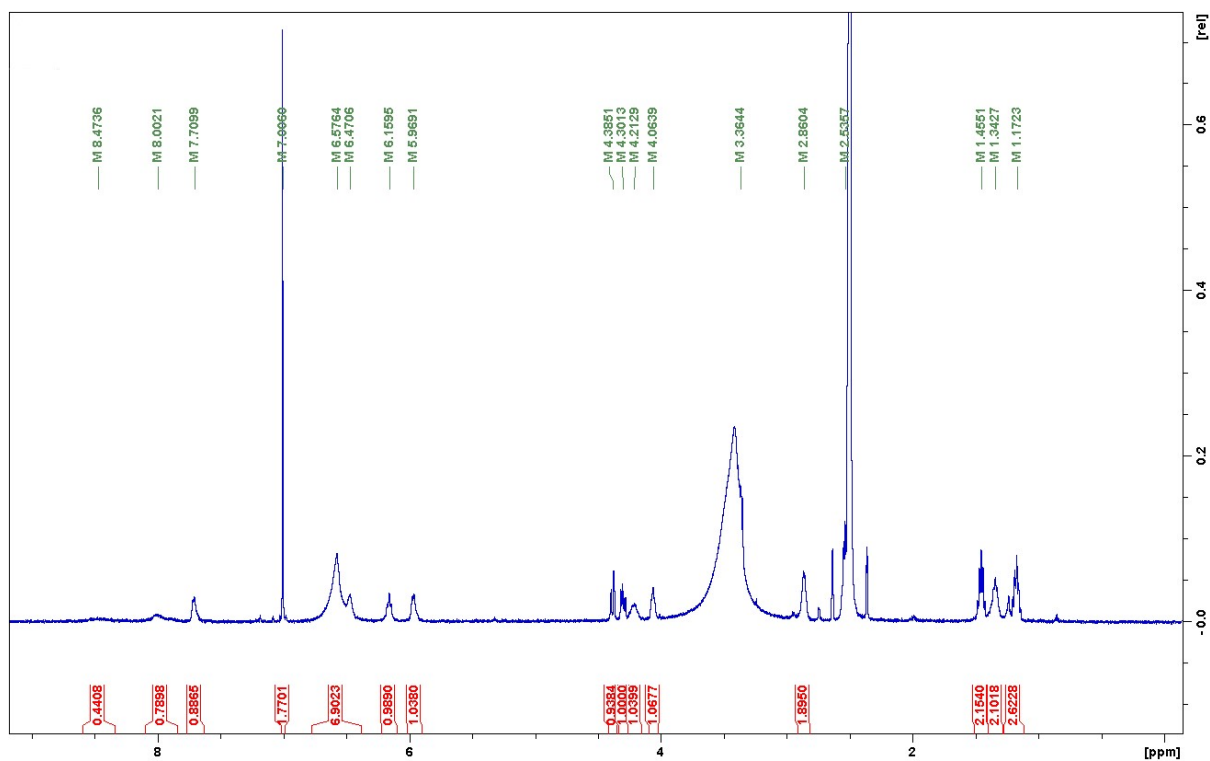

Figure S21: <sup>1</sup>H-NMR of CisPt-GemSucc-C<sub>5</sub>Mal.

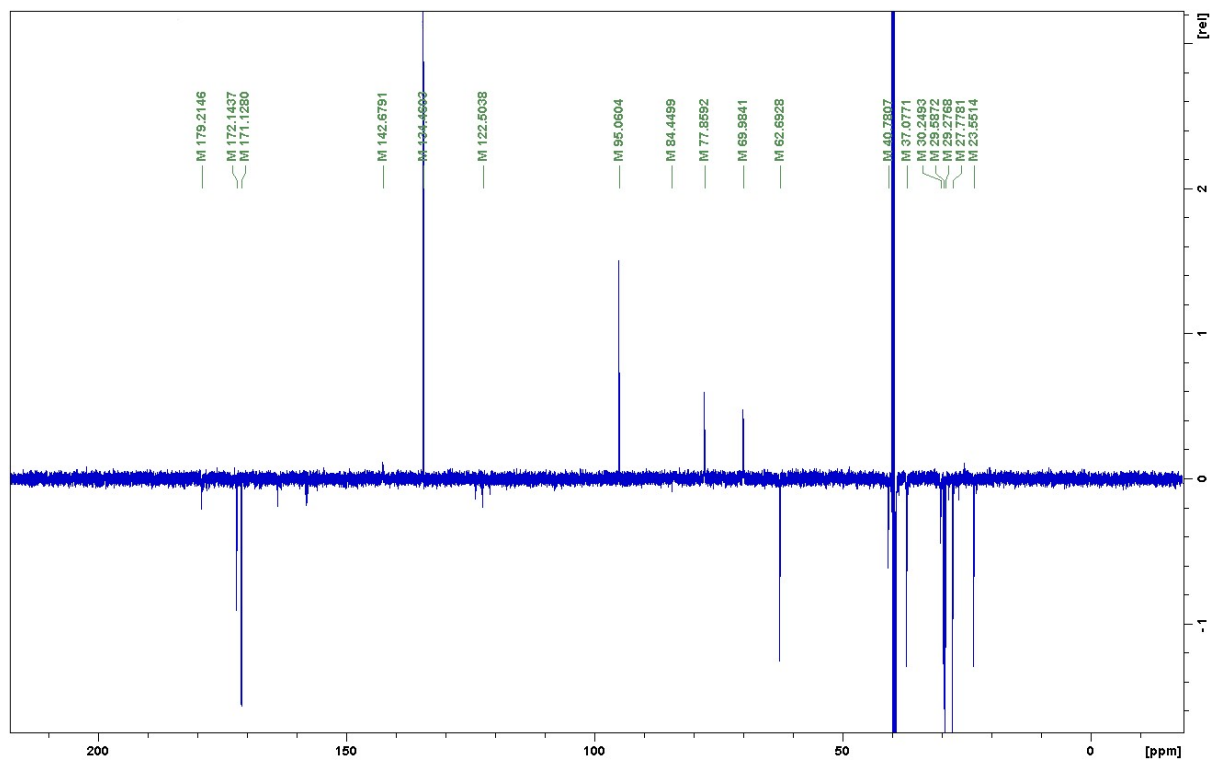

Figure S22: <sup>13</sup>C-NMR of CisPt-GemSucc-C<sub>5</sub>Mal.

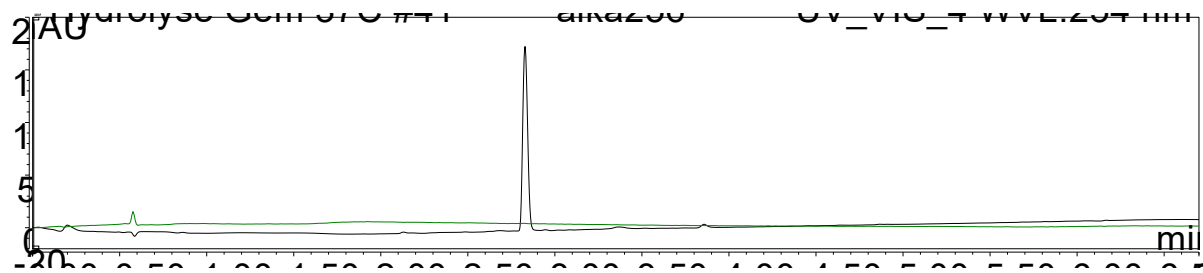

**Figure S23:** RP-HPLC chromatogram of CisPt-GemSucc-C<sub>5</sub>Mal.

# CarboPt-GemSucc-OAc

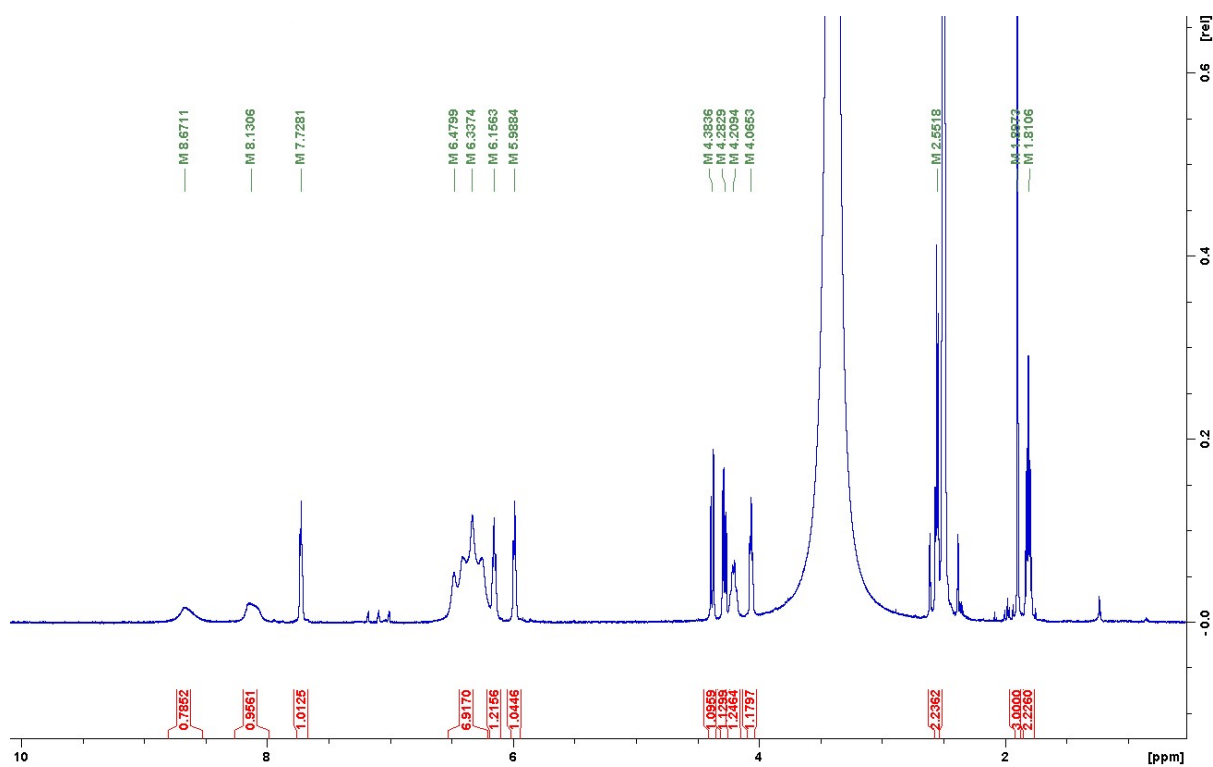

Figure S24: <sup>1</sup>H-NMR of CarboPt-GemSucc-OAc.

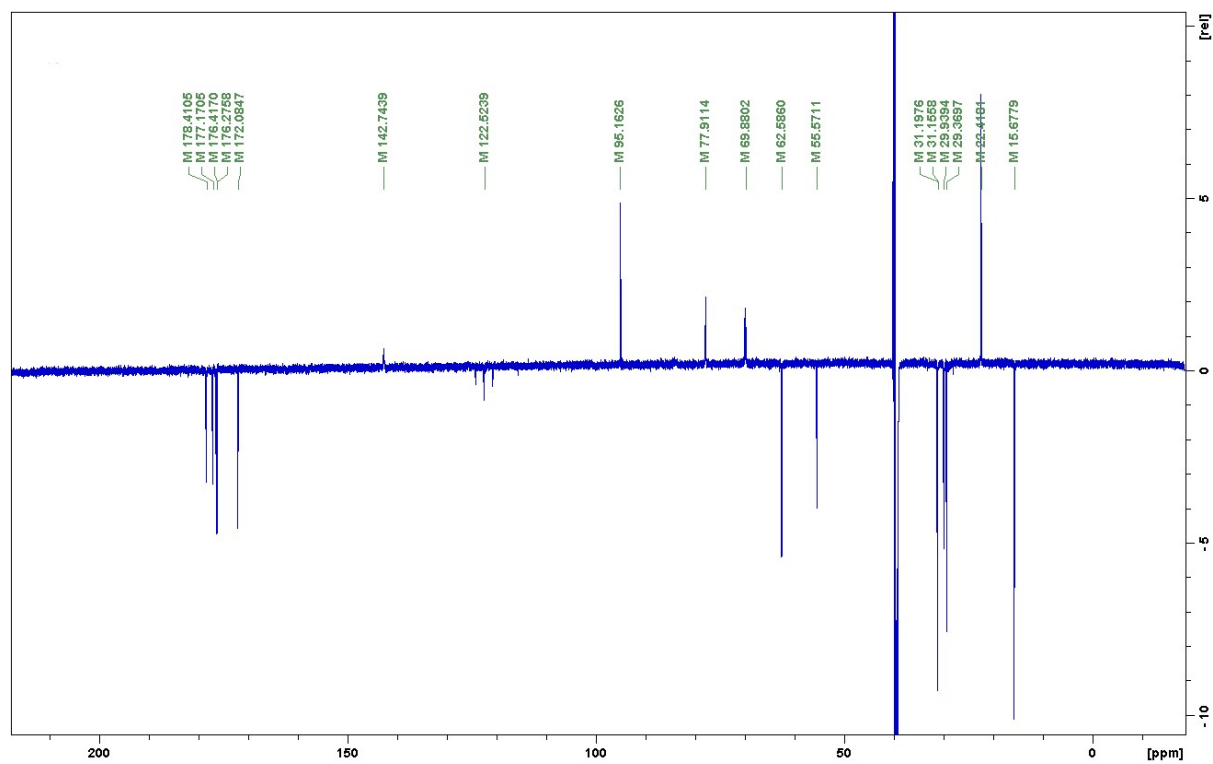

Figure S25: <sup>13</sup>C-NMR of CarboPt-GemSucc-OAc.

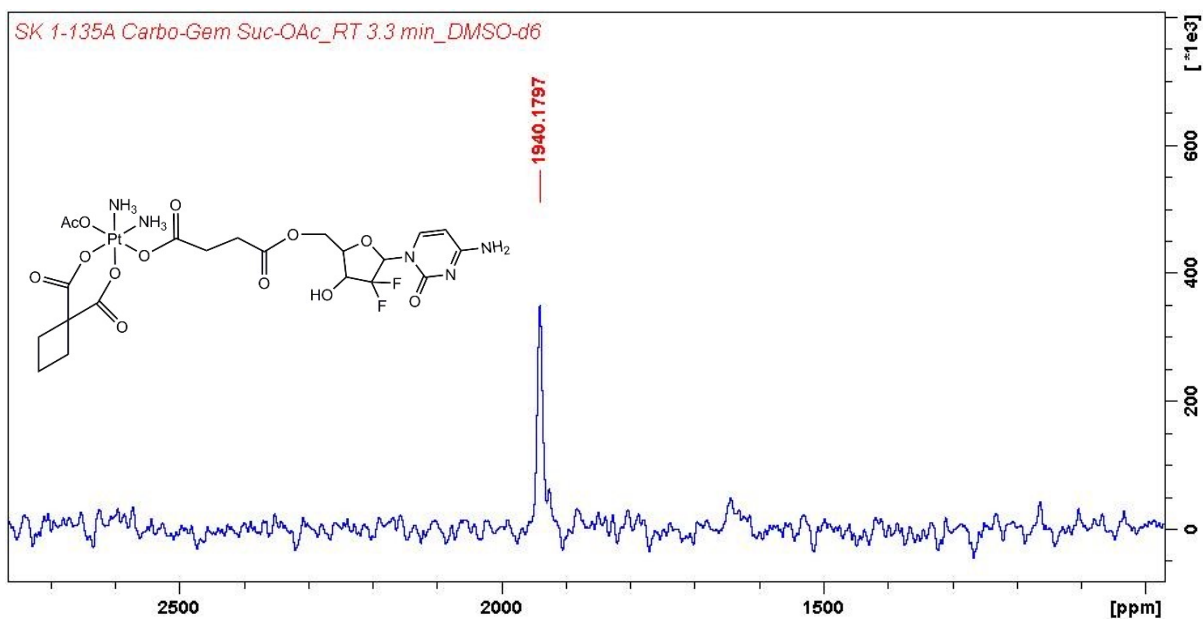

Figure S26:  $^{195}\text{Pt}$ -NMR of CarboPt-GemSucc-OAc.

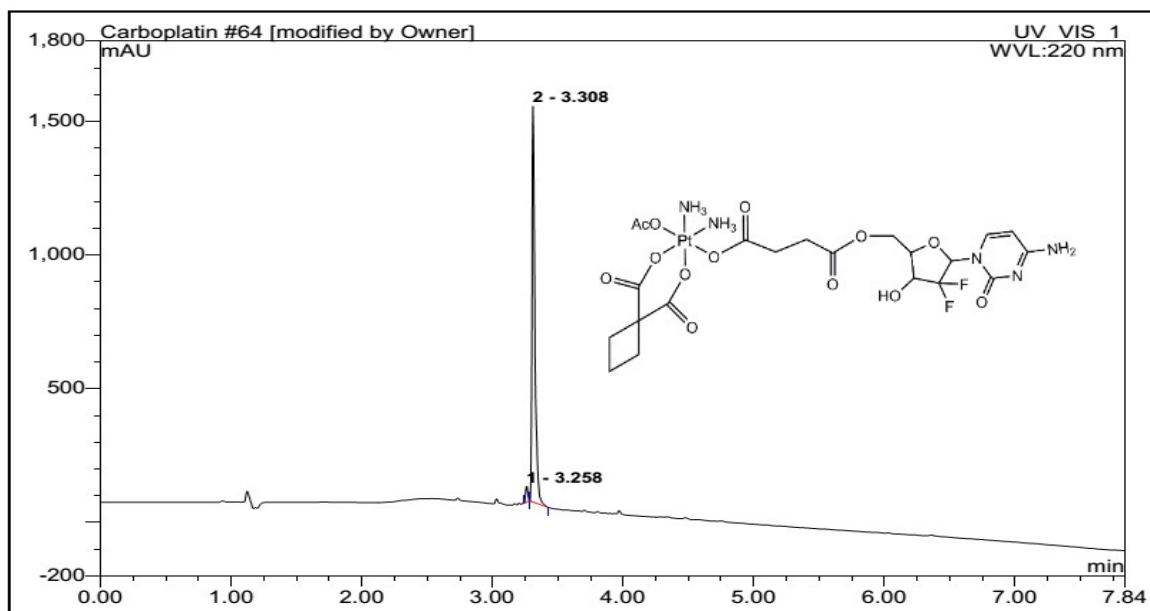

| No.           | Ret.Time<br>min | Peak Name | Height<br>mAU | Area<br>mAU*min | Rel.Area<br>% | Amount | Type |
|---------------|-----------------|-----------|---------------|-----------------|---------------|--------|------|
| 1             | 3.26            | n.a.      | 59.692        | 1.132           | 2.89          | n.a.   | BMB* |
| 2             | 3.31            | n.a.      | 1480.308      | 38.094          | 97.11         | n.a.   | bMB* |
| <b>Total:</b> |                 |           | 1540.000      | 39.226          | 100.00        | 0.000  |      |

Figure S27: RP-HPLC chromatogram of CarboPt-GemSucc-OAc.



### CarboPt-GemSucc-C<sub>5</sub>Mal

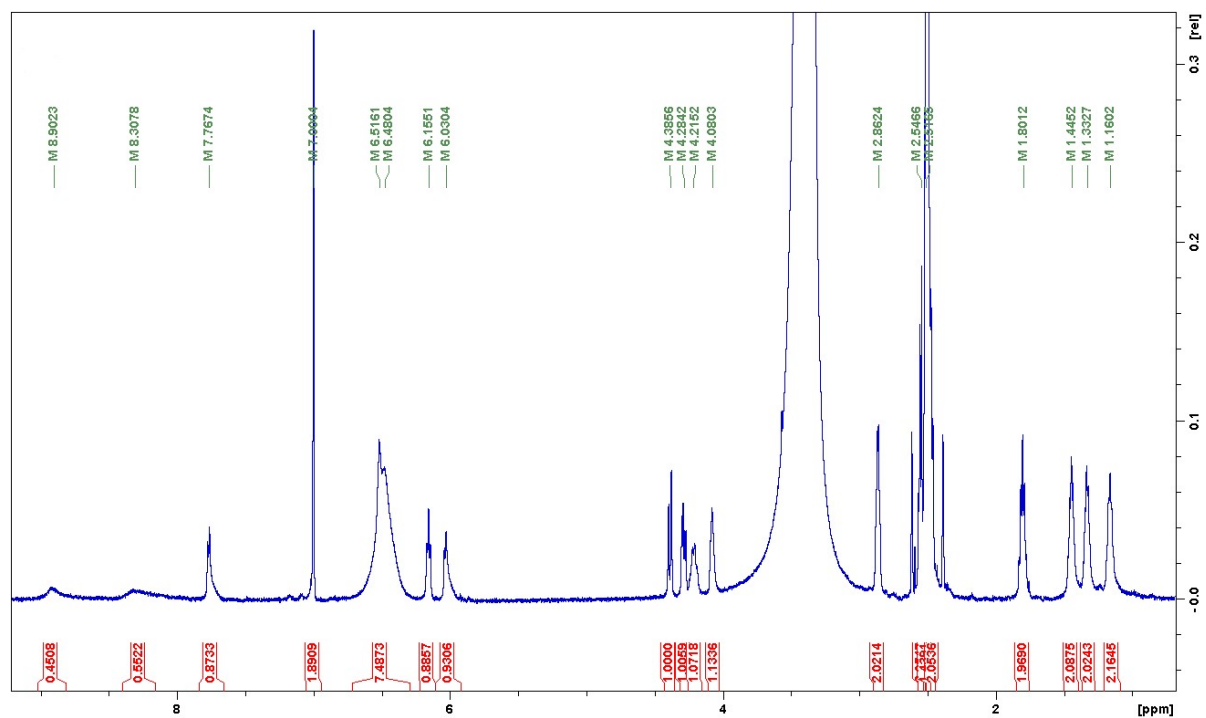

Figure S28: <sup>1</sup>H-NMR of CarboPt-GemSucc-C<sub>5</sub>Mal.

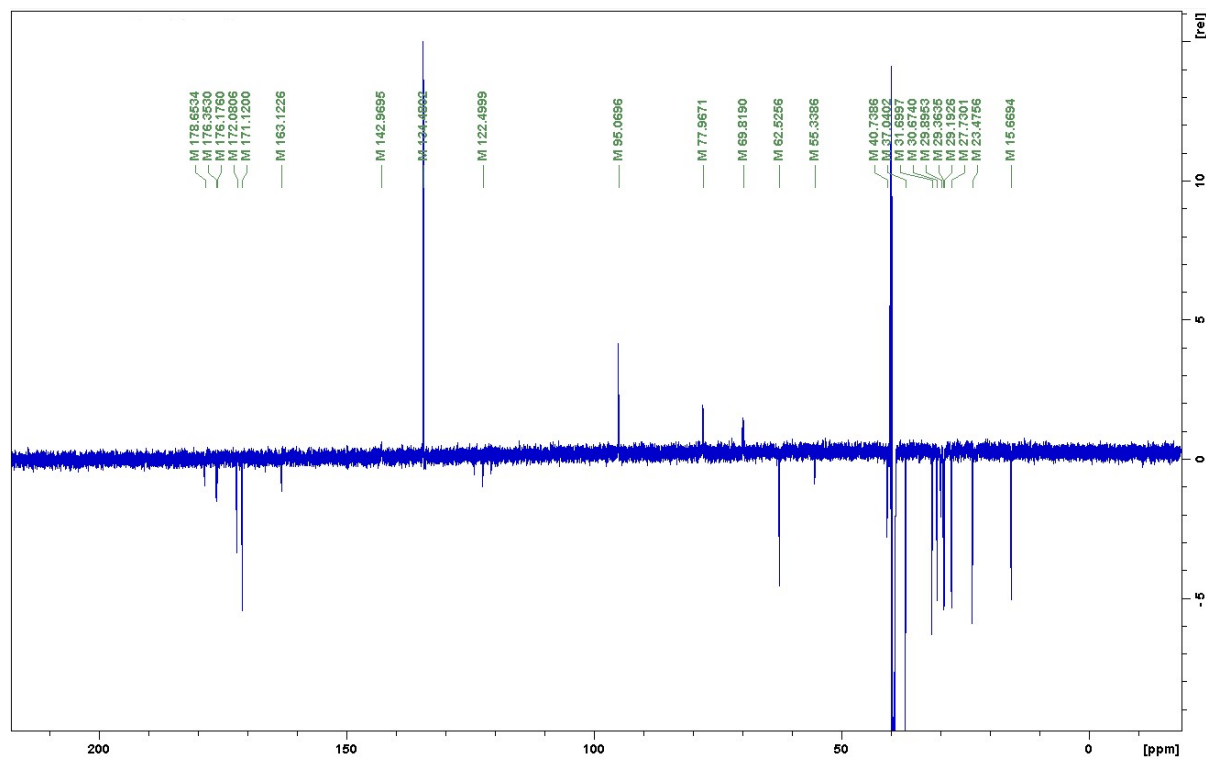

Figure S29: <sup>13</sup>C-NMR of CarboPt-GemSucc-C<sub>5</sub>Mal.

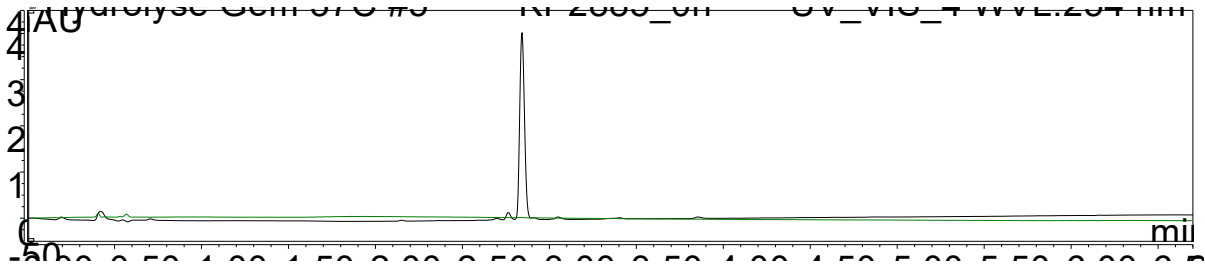

**Figure S30:** RP-HPLC chromatogram of CarboPt-GemSucc-C<sub>5</sub>Mal.
